# Supplementary material for: Clinical and Genetic Findings in a Series of Eight Families with Arthrogryposis
Source: Genes (Basel). 2021 Dec 23;13(1):29. doi: 10.3390/genes13010029 (PMC8774604; doi:10.3390/genes13010029)
Supplement: Supplementary file 1 [file genes-13-00029-s001.zip]

Archive with 4 entries (3 files):
- genes-1508372-Sup update/
- genes-1508372-Sup update/Table S1.pdf
- genes-1508372-Sup update/Table S2 Update.xlsx
- genes-1508372-Sup update/Text S1.pdf
