# Supplementary material for: Clinical and Genetic Findings in a Series of Eight Families with Arthrogryposis
Source: Genes (Basel). 2021 Dec 23;13(1):29. doi: 10.3390/genes13010029 (PMC8774604; doi:10.3390/genes13010029)
Supplement: Supplementary file 1 [file genes-13-00029-s001.zip › genes-1508372-Sup update/Table S2 Update.xlsx]

## Sheet: Table S2
	Pt 1 (Fy1)	Pt 2 (Fy1)	Pt 3 (Fy1)	Pt 4 (Fy2)	Pt 5 (Fy2)	Pt 6 (Fy2)	Pt 7 (Fy3)	Pt 8 (Fy3)	Pt 9 (Fy4)	Pt 10 (Fy5)	Pt 11 (Fy6)	Pt 12 (Fy7)	Pt 13 (Fy8)	Total
General information
Ethnic background	Dominican Republic-Italian	Italian	Italian	Roma	Roma	Roma	Italian	Italian	Italian	Italian	Italian	Italian	Italian
Sex	M	F	F	M	F	F	F	F	M	F	M	F	F
Age at first evaluation	prenatal period	20 years	44 years	1 day	prenatal period	prenatal period	1 month	27 years	6 days	1 day	1 year	3 years	16 years
Current age (years)	4	25	49	31	5	4	2	29	15	9	2	31	37
Prenatal findings
Decreased fetal movement (HP:0001558)	-	-	N.A.	-	-	+	+	-	+	-	-	+	-	4/12= 33%
Ultrasound abnormalities	left talipes equinovarus, hand clenching, overlapping fingers	-	N.A.	polyhydramnios (HP:0001561)	left hand clenching, ulnar deviation of the right hand, rocker bottom foot, reduced stomach bubble	hand clenching, adducted thumb, rocker bottom foot, choroid plexus cyst (HP:0002190)	oligohydramnios (HP:0001562)	-	-	polyhydramnios, short femurs (HP:0003097)	-	oligohydramnios	-	7/12= 58%
Genetic testing	karyotype: 46,XY	-	-	-	-	-	-	-	karyotype: 46,XY	karyotype: 46,XX	NIPT (chr21,18,13,16,9,X,Y + main microdel/dup)	-	-	4/13= 31%
Postnatal features
Short stature (HP:0004322)	-	+	-	+	-	+	-	-	+	+	-	-	+	6/13= 46%
Ptosis (HP:0000508)	-	-	-	-	-	-	-	-	+	+	-	-	+	3/13= 23%
Epicanthus (HP:0000286)	-	-	-	-	-	-	-	-	+	+	-	-	+	3/13= 23%
Narrow mouth (HP:0000160)	+	+	-	+	+	+	-	-	-	+	-	-	+	7/13= 54%
Microretrognathia (HP:0000308)	+	-	-	+	+	+	+	+	+	+	+	+	+	11/13= 85%
Trismus (HP:0000211)	+	+	+	+	+	+	-	-	-	+	-	-	+	8/13= 61%
Myopathic facies (HP:0002058)	-	-	-	-	-	-	-	-	+	+	-	-	+	3/13= 23%
Ulnar deviation of the hand (HP:0009487)	+	+	-	+	+	+	+	+	+	+	+	-	+, monolateral	11/13= 85%
Hand clenching (HP:0001188)	+	-	-	+	+	+	+	-	+	+	+	-	-	8/13= 61%
Adducted thumb (HP:0001181)	+	+	-	+	+	+	+	+	+, monolateral	+	+	-	+	11/13= 85%
Overlapping fingers (HP:0010557)	+	-	-	+	+	+	+	+	-	+	+	+	-	9/13= 70%
Camptodactyly (HP:0012385)	+	-	-	+	+, monolateral	+	-	+	+, monolateral	+, monolateral	-	-	+	8/13= 61%
Single transverse palmar crease (HP:0000954)	+	-	-	+	+, monolateral	+	-	-	+, monolateral	+	+, monolateral	-	+	8/13= 61%
Talipes equinovarus (HP:0001762)	+	+	+	+	-	+	-	-	-	-	+	+	+, monolateral	8/13= 61%
Rocker bottom foot (HP:0001838)	-	-	-	-	+	-	+	+	+	+	-	-	-	5/13= 38%
Overlapping toes (HP:0001845)	+	+	+	+	+	-	+, monolateral	-	+	-	+	+	+	10/13= 77%
Prominent calcaneus (HP:0012428)	+, monolateral	-	-	+	+	-	+	+	+	+	+	+, monolateral	-	9/13= 69%
Pterygium (HP:0001059)	-	thumbs	thumbs	thumbs	-	-	-	-	right thumb, III left finger, antecubital area, neck, popliteal area	neck, axillae, antecubital, digits, popliteal area	-	axillae, antecubital, digits	digits	7/13= 54%
Scoliosis (HP:0002650)	-	-	+	-	-	-	-	-	+	+	-	+	+	5/13= 38%
Hip dysplasia (HP:0001385)	-	-	-	+	-	-	-	-	+	+	-	-	-	3/13= 23%
Hypoplasia involving the musculature of the extremities (HP:0009128)	-	-	-	+ (calf muscle)	-	-	-	-	-	+ (calf muscle)	-	+	-	3/13= 23%
Other clinical findings	chin with horizontal crease (HP:0011823), inguinal hernia	right cutaneous syndactyly I-II fingers, muscular asthenia and paresthesias, strabismus (HP:0000486)	clinodactyly of the II left finger	-	nevus flammeus of the forehead (HP:0007413), delayed speech and language development (HP:0000750), mild dilatation of ascendent aorta	laryngeal stridor (HP:0006511)	brachycephaly (HP:0000248)	right ovarian dermoid cyst	Duane anomaly (HP:0009921), furrowed tongue (HP:0000221), short neck (HP:0000470), pilonidal sinus (HP:0010769), bilateral Perthes disease, left genu recurvatum (HP:0002816), pretibial linear vertical creases, bilateral cryptorchidism (HP:0000028)	short neck, pectus carinatum (HP:0000768), lumbar hyperlordosis (HP:0002938), velopharyngeal insufficiency, mega cisterna magna (HP:0002280), anomaly of the craniovertebral junction, calcaneal linear vertical creases	familial macrocephaly, frontal bossing ( HP:0002007), hypertelorism (HP:0000316), blue sclerae (HP:0000592), bifid uvula (HP:0000193), thin skin (HP:0000963), bicuspid aortic valve (HP:0001647), mild dilatation of aortic root	short neck, down-sloping shoulders (HP:0200021)	sparse hair (HP:0008070), low-set ears (HP:0000369), microtia (HP:0008551), posterior embriotoxon, narrow right pulmonary artery, delayed speech and language development	12/13= 92%
Genetic testing
Postnatal tests	NGS panel	segregation analysis	segregation analysis	karyotype, NGS panel	NGS panel	segregation analysis	NGS panel	segregation analysis	FLNB analysis, NGS panel, WES	CGH-array, DMPKanalysis, NGS panel	NGS panels	karyotype	karyotype on blood and fibroblasts, FISH for 7q11.23, subtelomeric FISH, FISH for chr8 on fibroblasts, WES
Molecular diagnosis	het NM_003289.4(TPM2):c.463G>A, p.(A155T)			het NM_006757.3(TNNT3):c.187C>T, p.(R63C)			het NM_001145829.1(TNNI2):c.499_501del, p.(E167del)		comp het NM_004826(ECEL1):c.[1630C>T];[1700C>G], p.[(R544C)];[(P567R)]	hom NM_005199.4(CHRNG):c.459dup, p.(V154Sfs*24)	het NM_ 001024847.2(TGFBR2):c.1595dupA, p.(H532Qfs*9)	/	/	11/12= 92%
Diagnosis	Distal Arthrogryposis 1			Distal Arthrogryposis 1			Distal Arthrogryposis 2B		Distal Arthrogryposis 5D	Escobar syndrome	Loeys-Dietz syndrome 2	Amyoplasia	Undefined
Treatment
Physiotherapy	+	-	-	-	+	+	+	-	+	+	+	-	+	8/13= 61%
Orthotics	+	+	-	-	+	-	+	+	+	-	+	+	+	9/13= 69%
Orthopedic shoes	+	+	-	+	-	-	+	+	+	+	+	+	+	10/13= 77%
Orthoses	+	-	-	-	+	+	+	+	+	+	+	+	-	9/13= 61%
Casts/Splints	+	-	-	+	+	+	+	+	+	+	+	-	+	10/13= 77%
Number of surgeries (type)	4 (left heel, left foot, thumbs, hands)	2 (feet, right hand)	1 (feet)	5 (feet, left hand)	1 (left 3rd finger)	-	1 (thumb)	1 (thumb)	5 (hip, foot, knee, column)	2 (feet, hips)	2 (heels)	5 (lower limbs, hands)	6 (feet, back)	12/13= 92%
Corset	-	-	-	-	-	-	-	-	+	-	-	-	+	2/13= 15%
